# Supplementary material for: Europium-doped amorphous calcium phosphate porous nanospheres: preparation and application as luminescent drug carriers
Source: Springer Nature journal article supplement (doi:10.1186/1556-276x-6-67), 2011-01-12

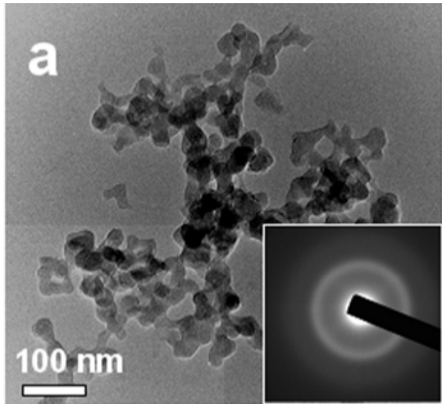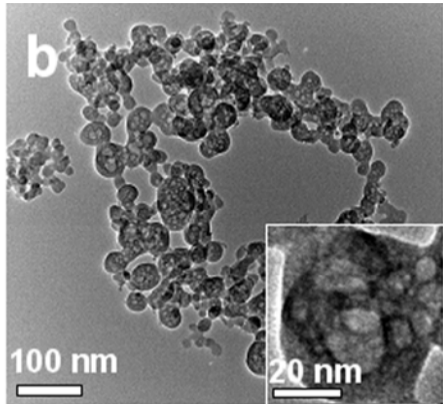

Supplement: 11671_2010_2_MOESM1_ESM.pdf [file 11671_2010_2_MOESM1_ESM.pdf]
